# Supplementary material
Source: PubMed Central journal article supplement (PMC6047936)
Supplement: NIHMS959083-supplement-supplemental.pdf [file NIHMS959083-supplement-supplemental.pdf]

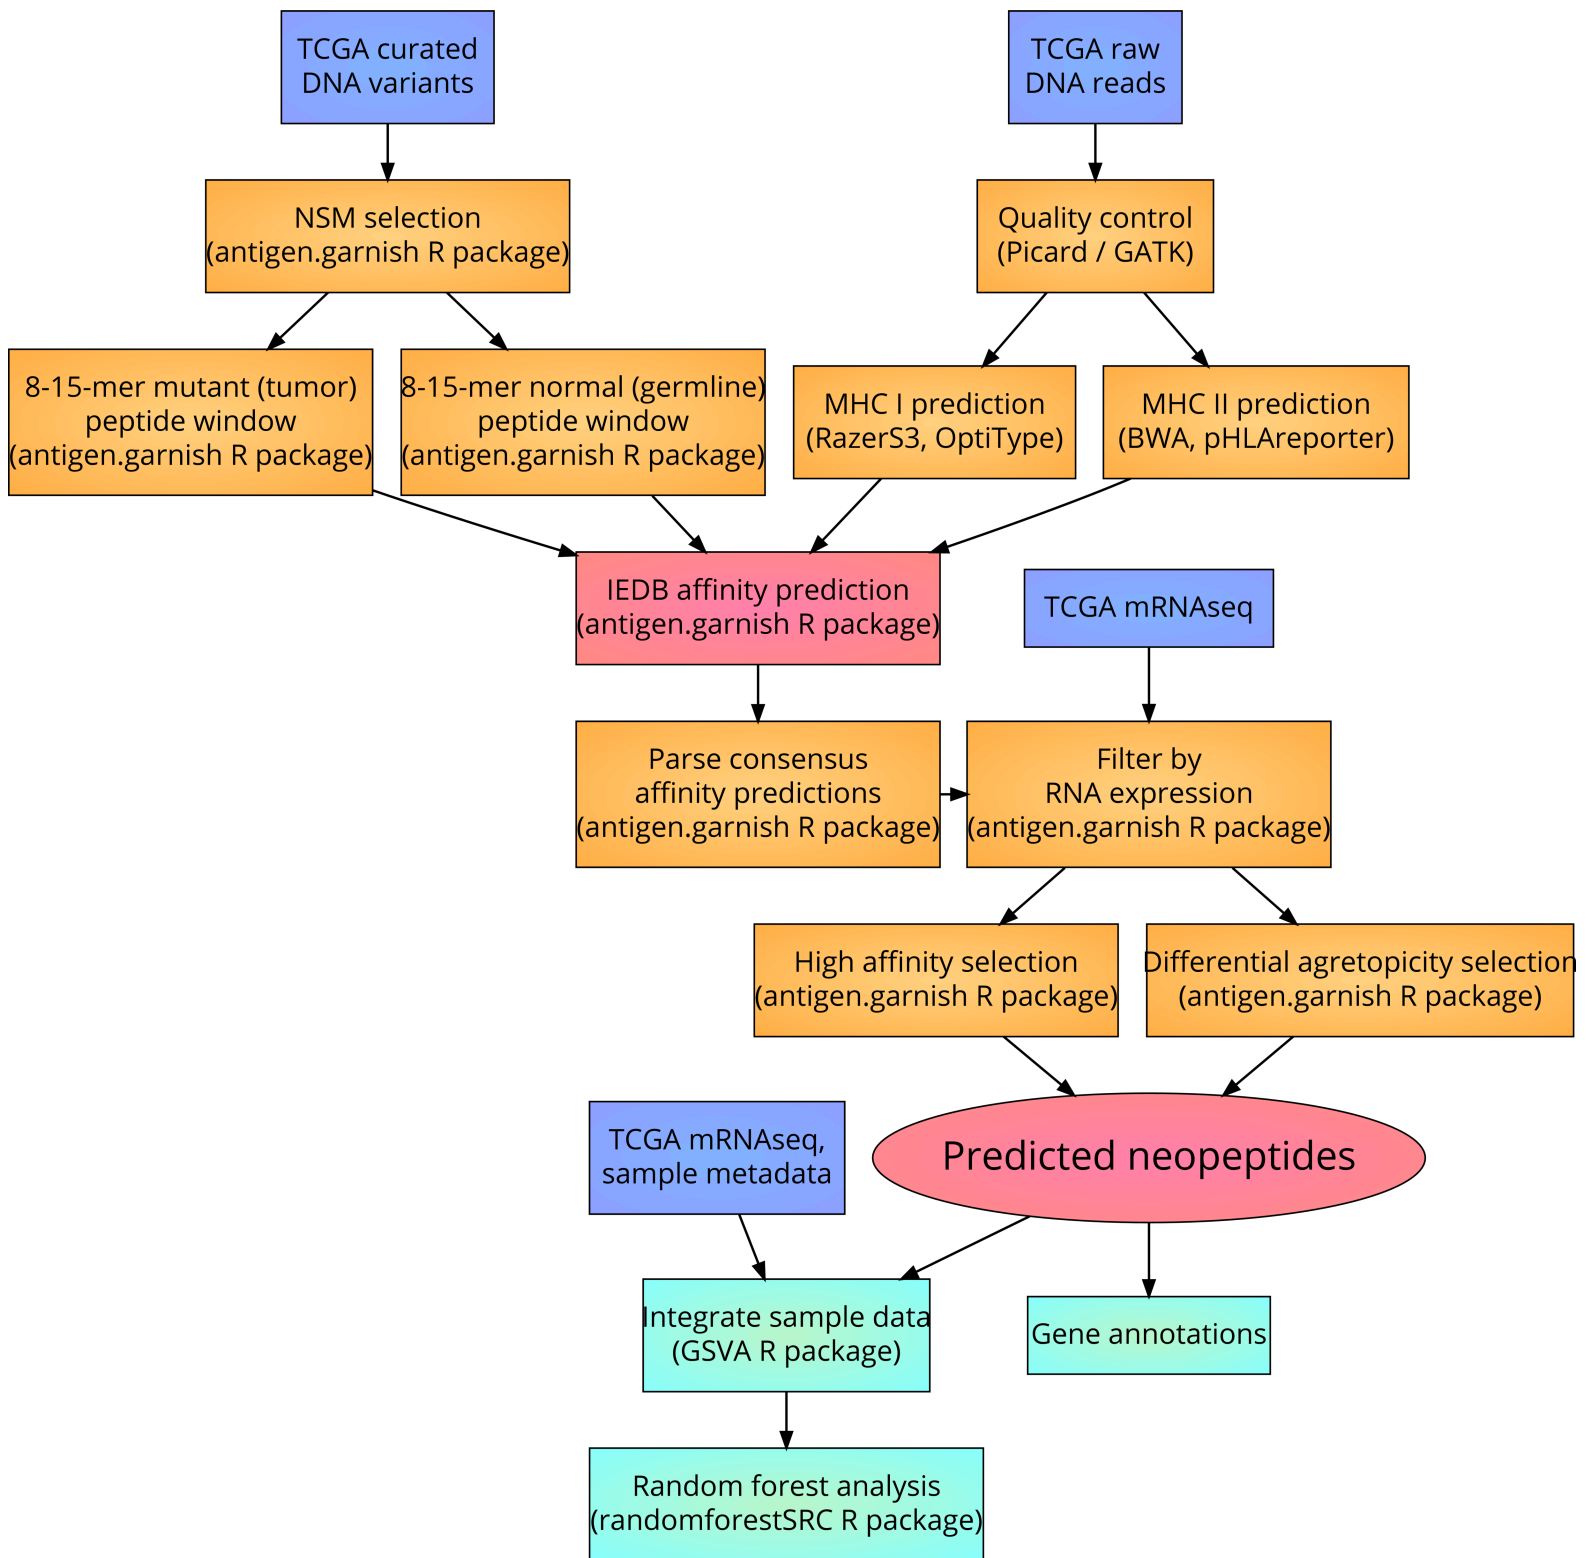

**Supplemental figure 1**

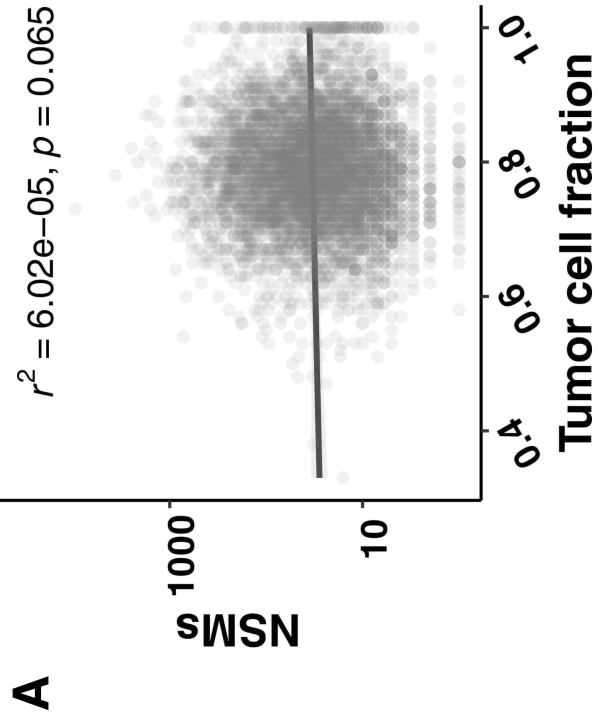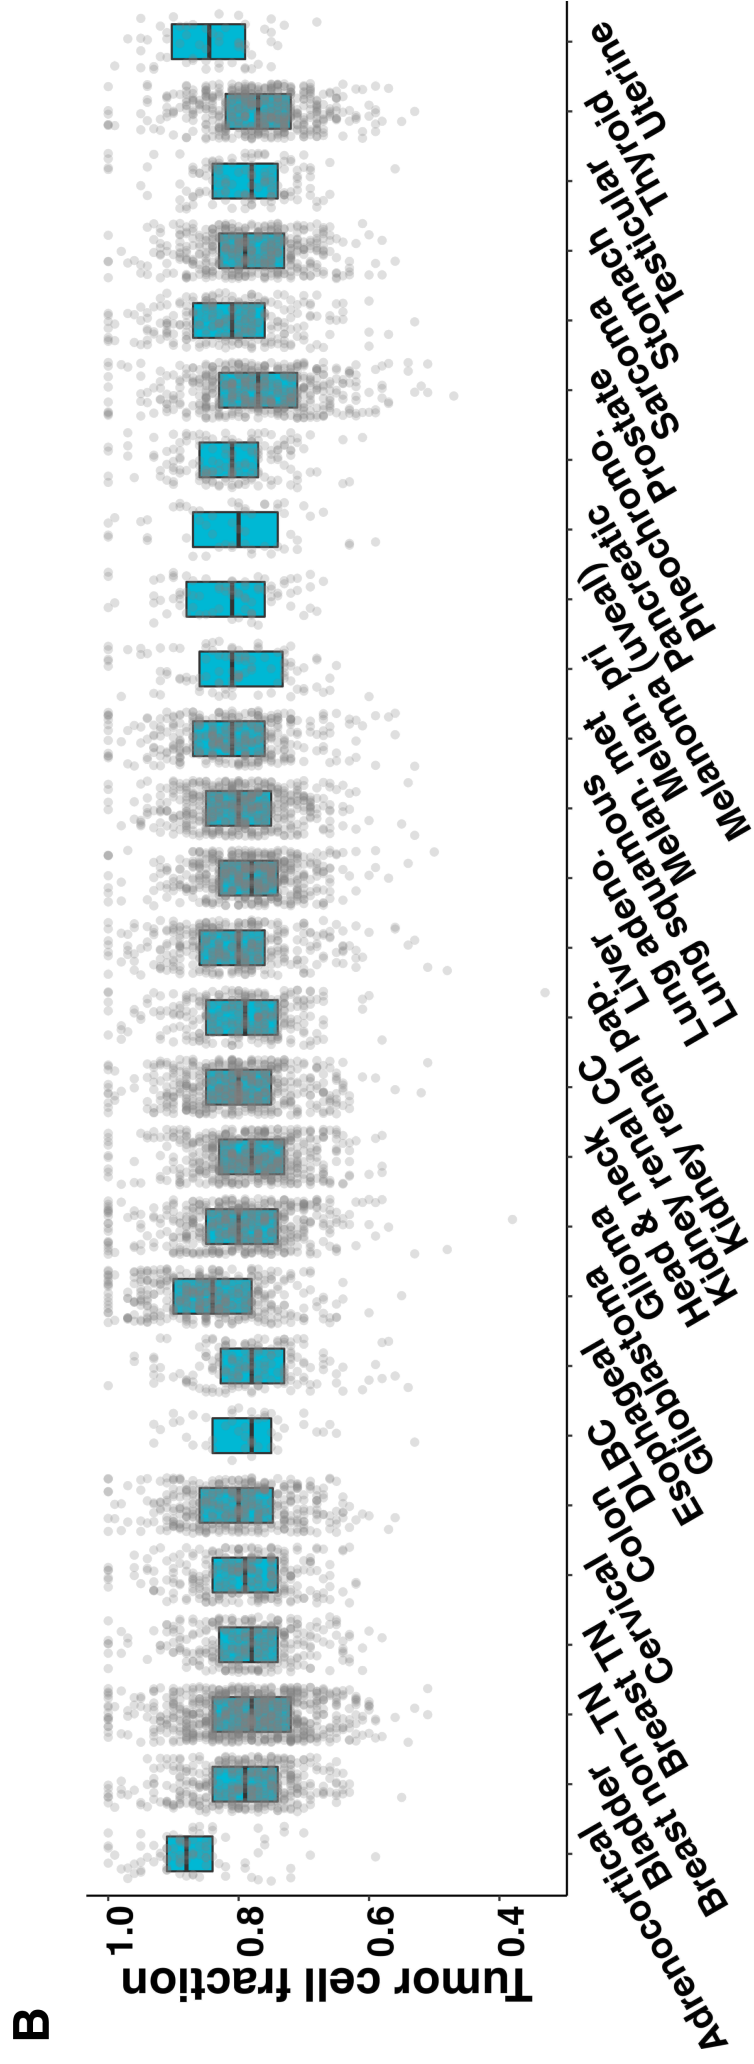

Supplemental figure 2

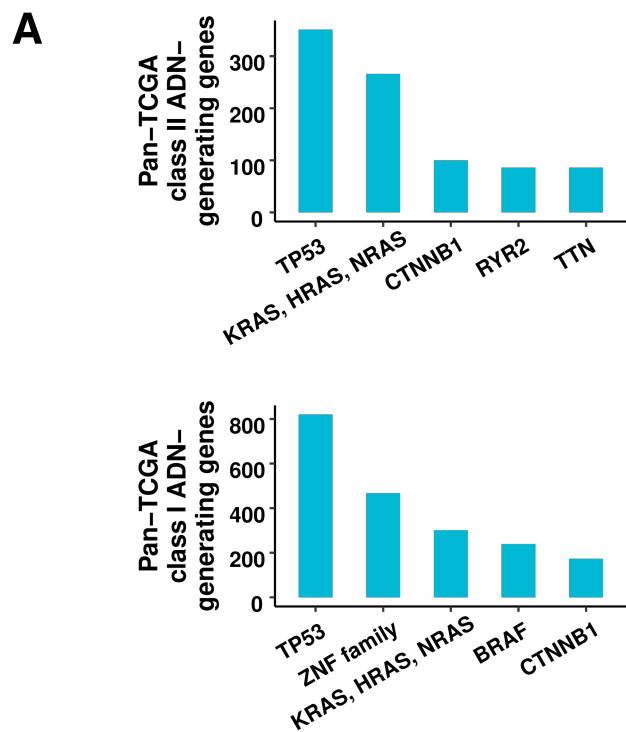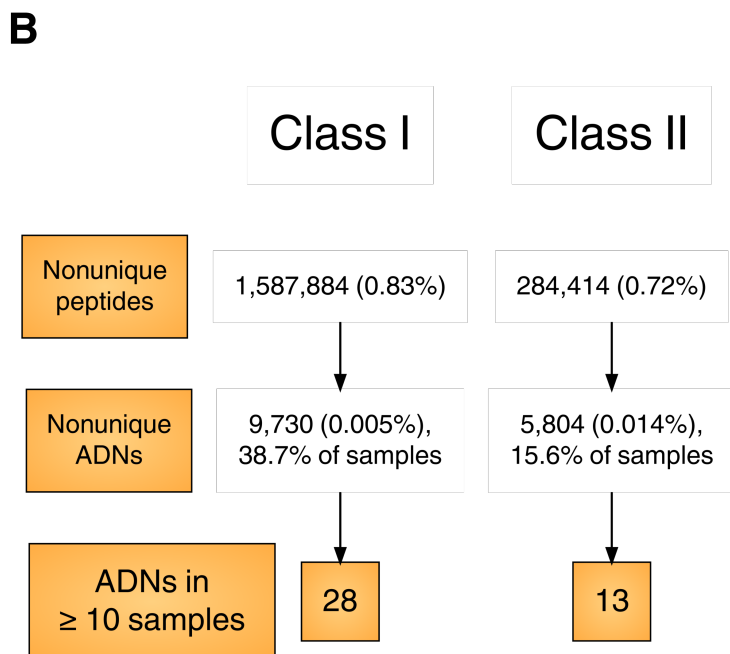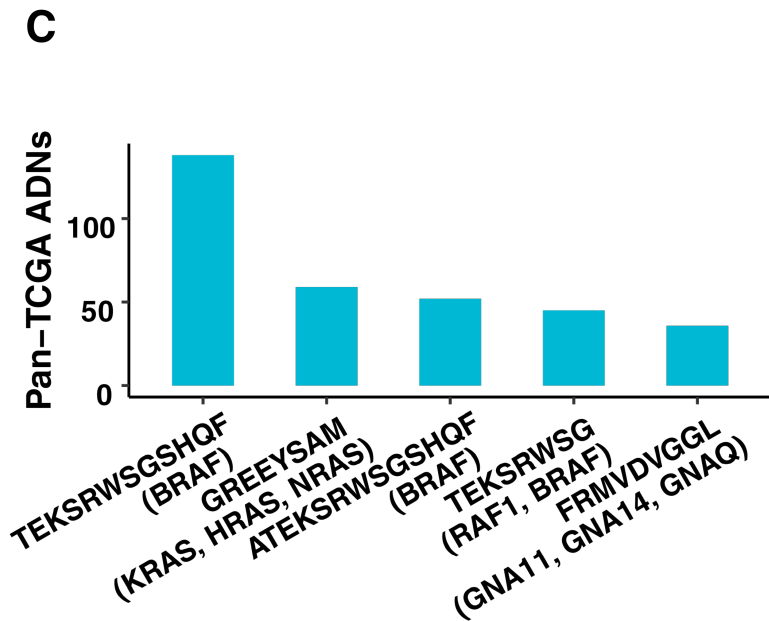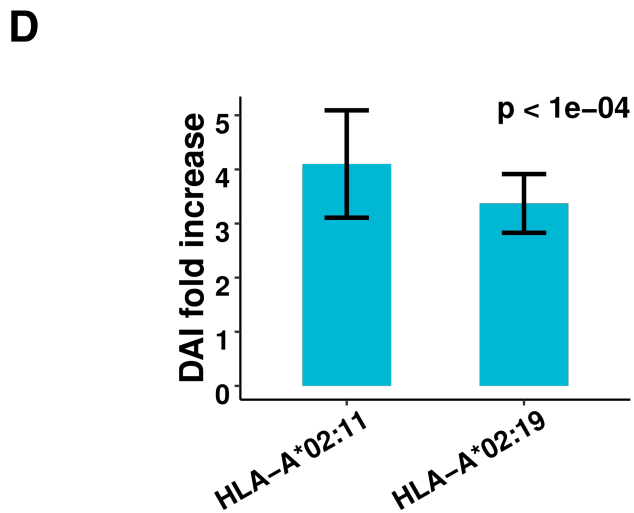

Supplemental figure 3

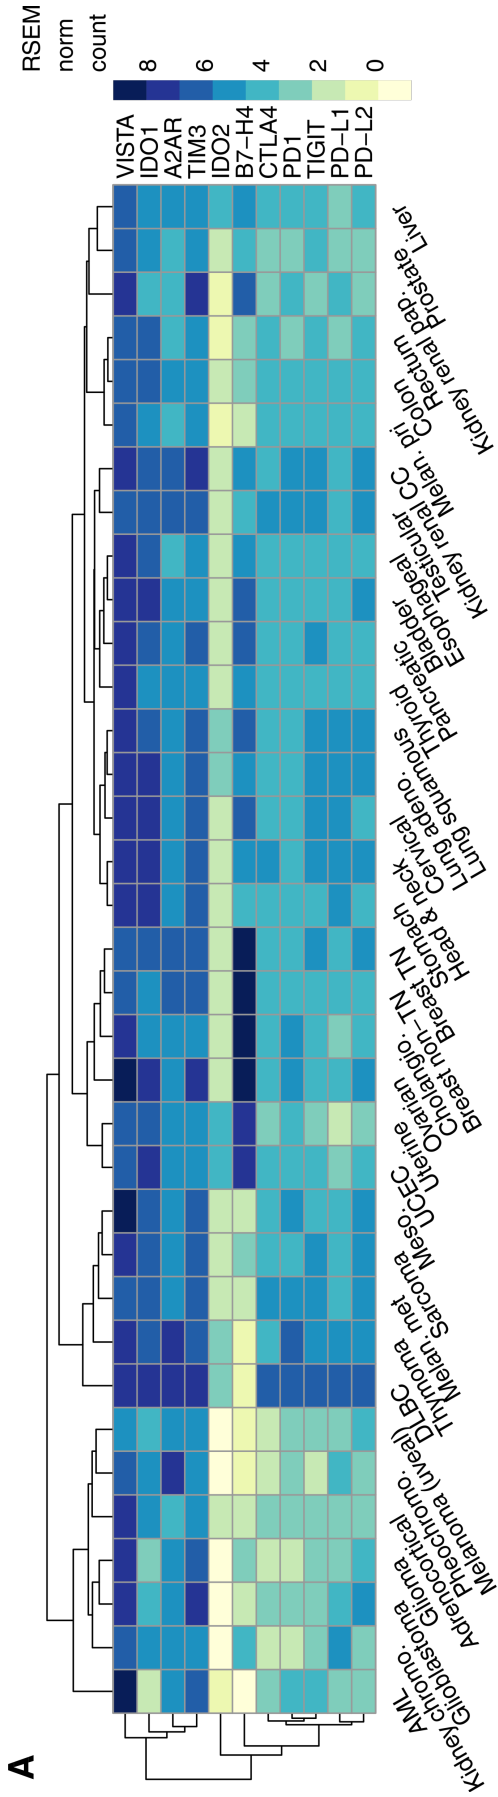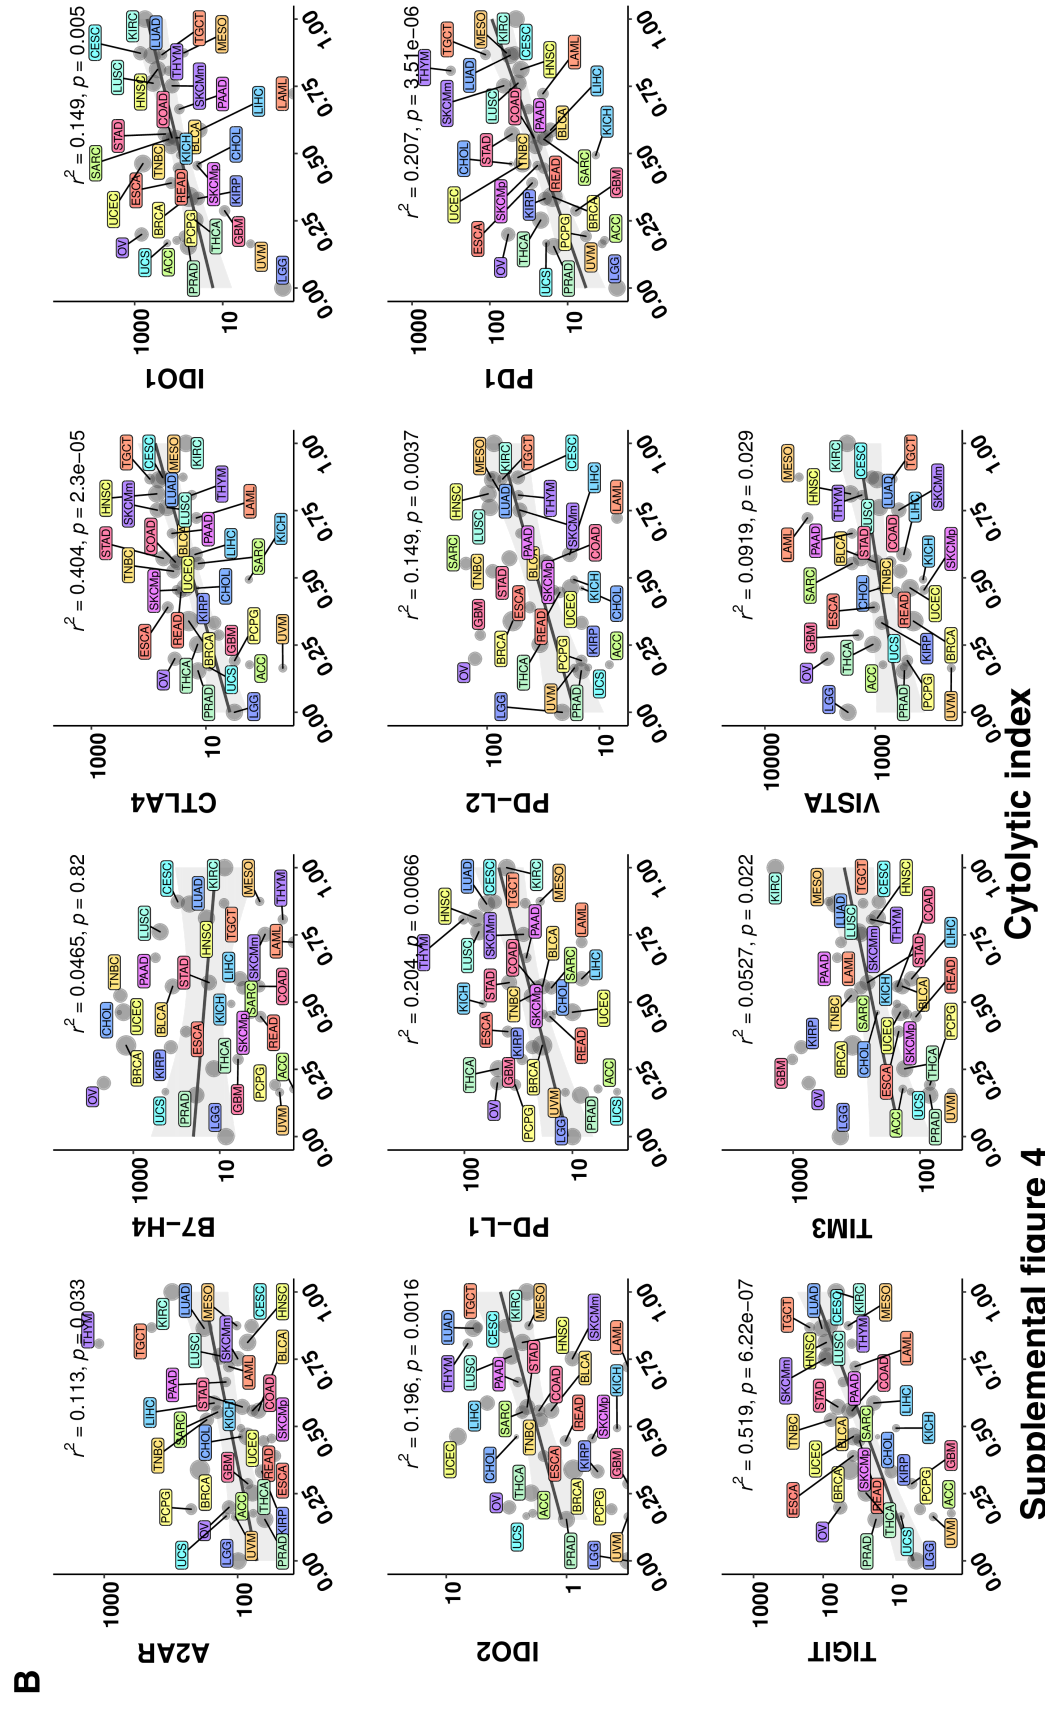

Supplemental figure 4

**A**

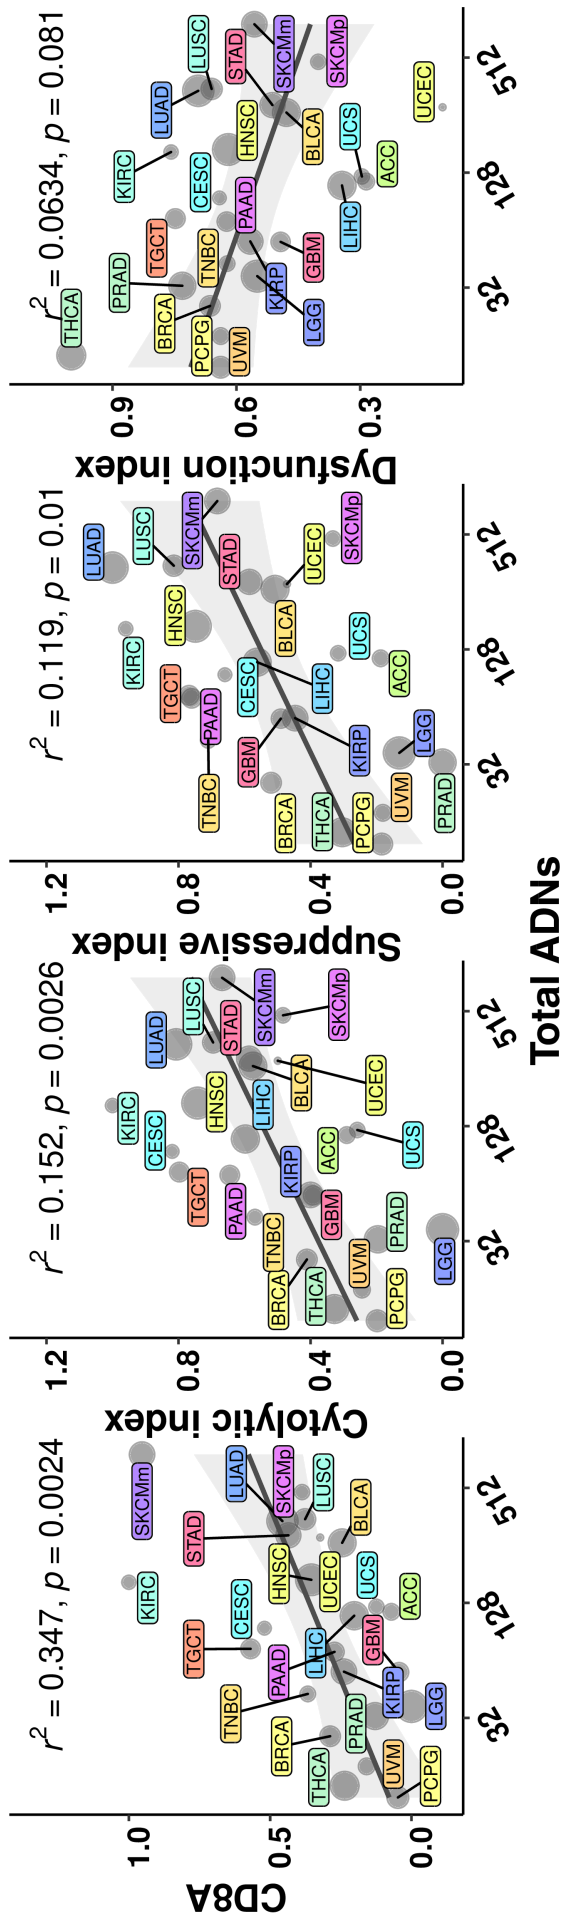

**B**

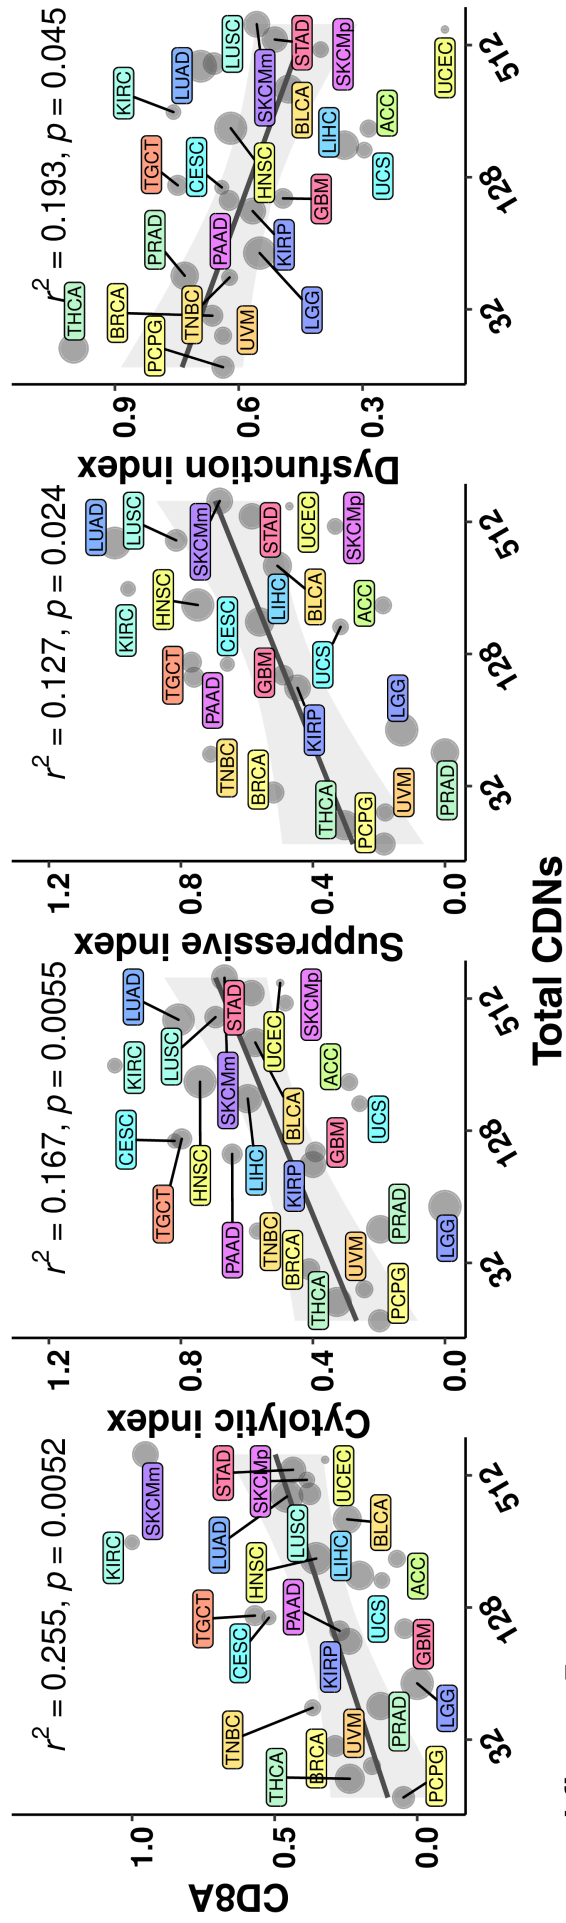

Supplemental figure 5

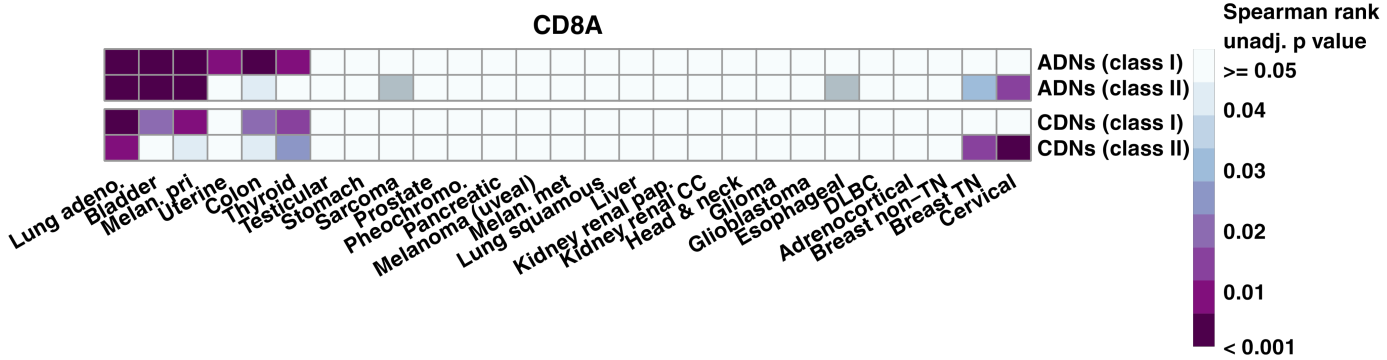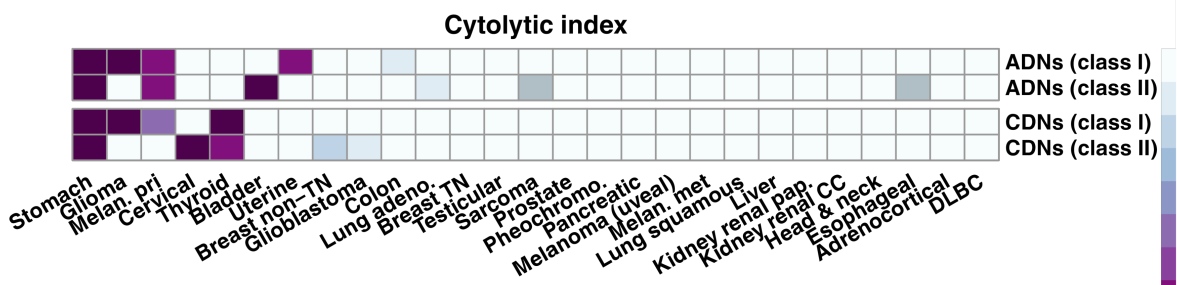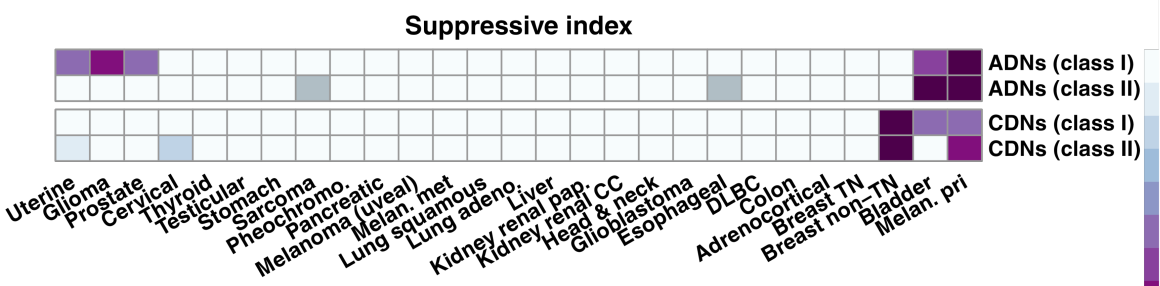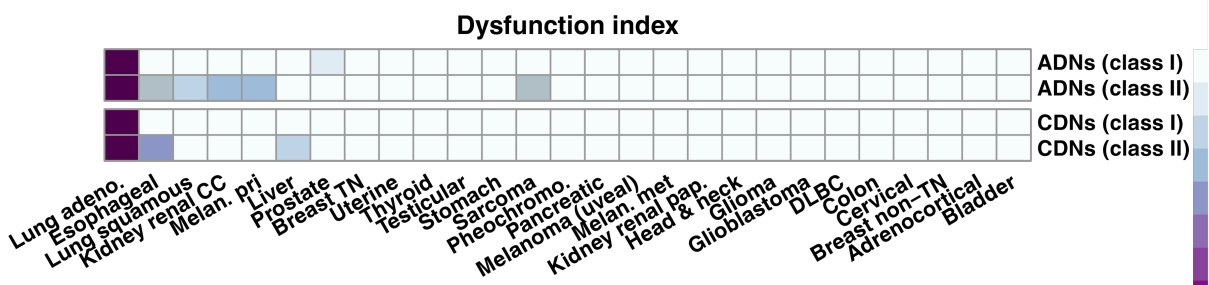

Supplemental figure 6

**A**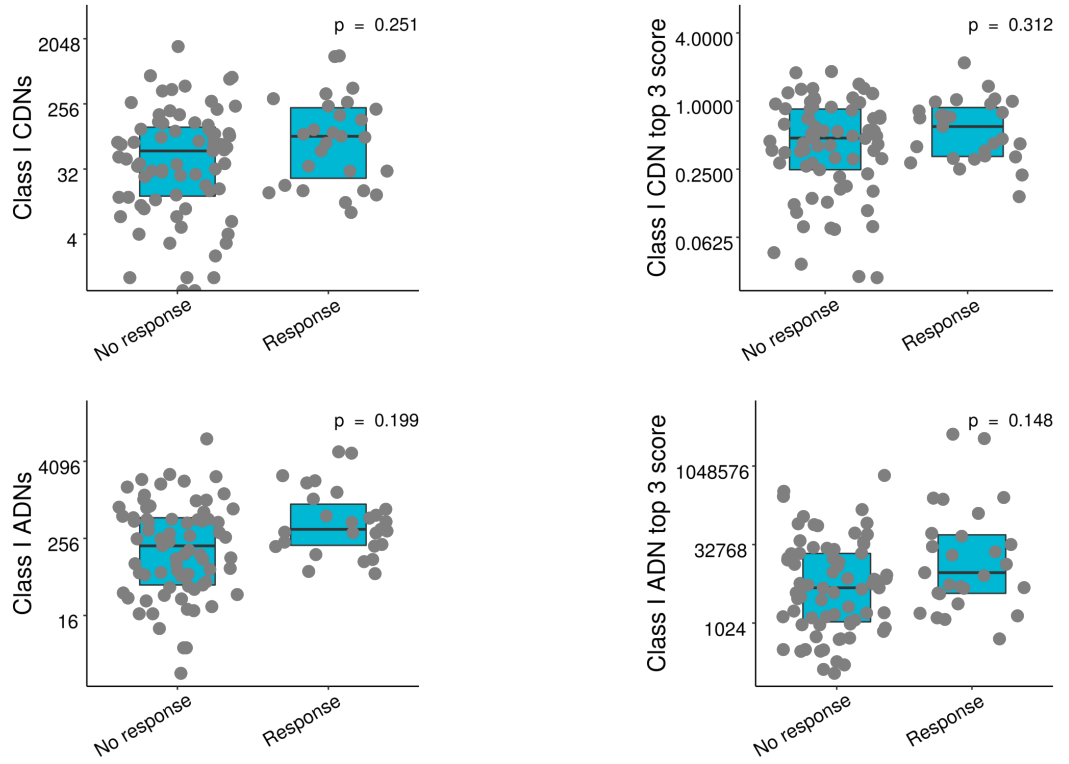**B**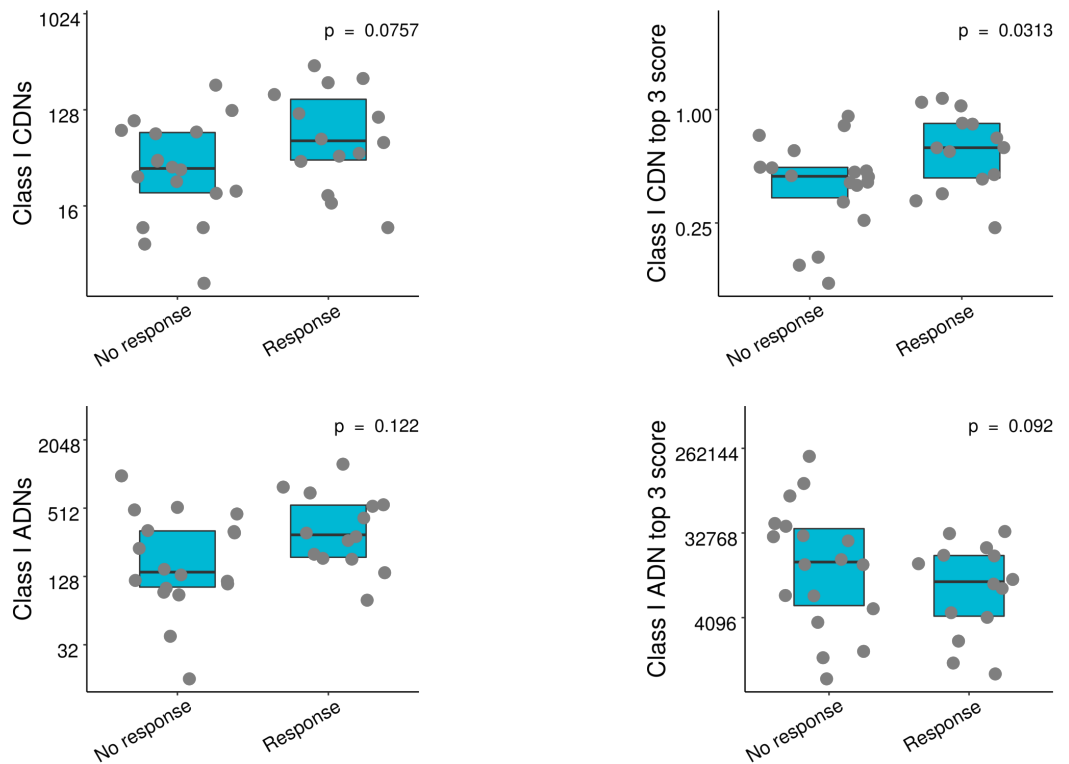

**Checkpoint blockade status**  
**Supplemental figure 7**
